# Supplementary material
Source: PubMed Central journal article supplement (PMC3957624)
Supplement: AEM.03729-13_zam999105179so1.pdf [file AEM.03729-13_zam999105179so1.pdf]

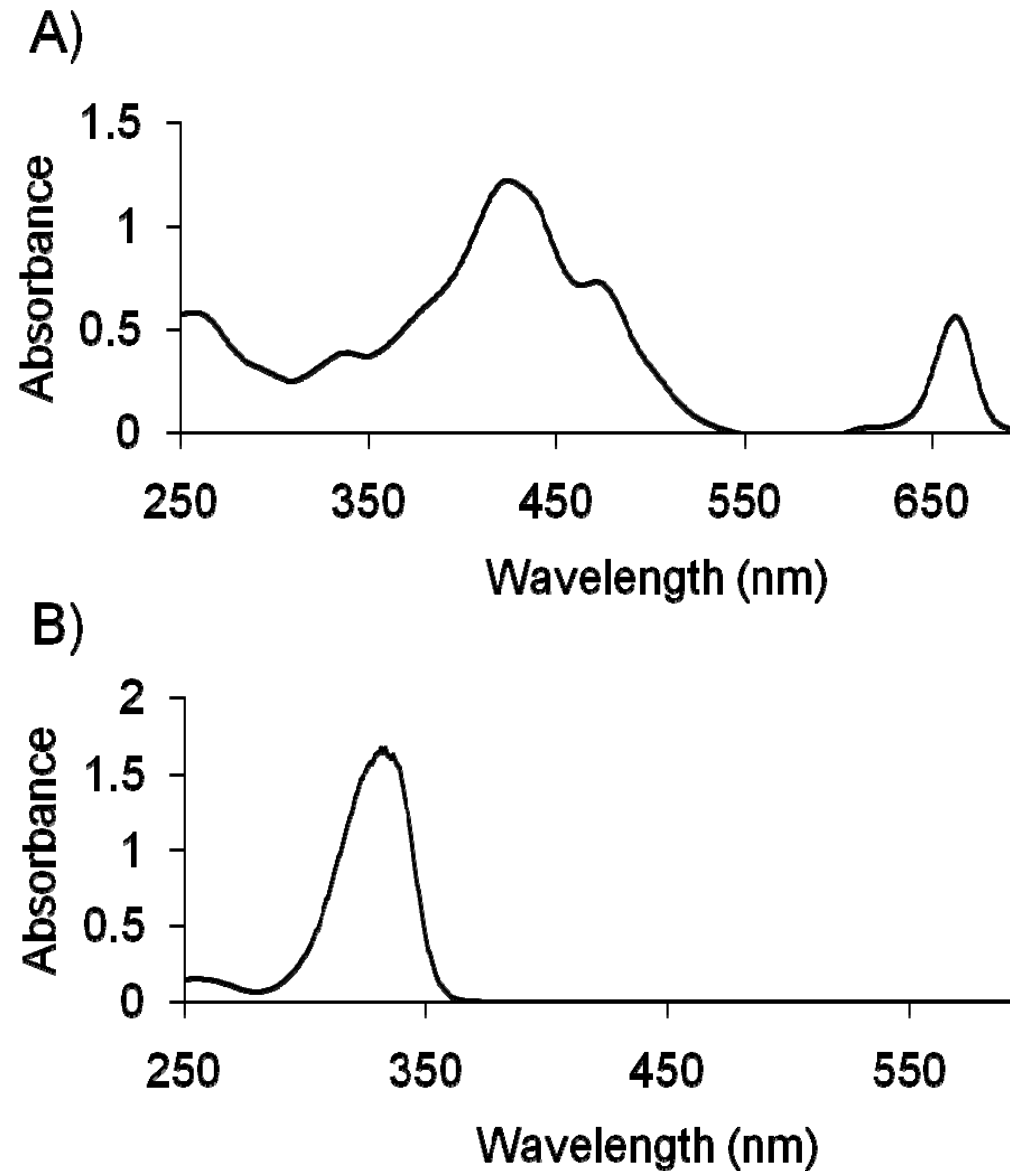

Supplemental Figure 1. UV-absorption spectra of methanolic and water extracts produced by the halotolerant cyanobacterium *Aphanothece halophytica*. (A) Methanolic phase. (B) Water phase. *A. halophytica* cells were grown in BG11+AT+0.5 M NaCl for 14 days before extraction.

Supplemental Table 1. Primers for isolation and expression of *Ap-MAA* gene

| Primers          | 5' - 3'                                              | Base pair |
|------------------|------------------------------------------------------|-----------|
| Ap3858bam        | 5' -GGATCCAAGTCTAGCTGTATCTCTAC-3'                    | 26 mer    |
| Ap3858His6bam    | 5' -GGATCCCTAGTGATGGTGGTGGTGGACTGTAGATAACAGTTC-3'    | 45 mer    |
| Ap3857-55xho     | 5' -CTCGAGTAGTCTTTTCGGTTACGGG-3'                     | 25 mer    |
| Ap3857-55His6xho | 5' -CTCGAGCTAGTGATGGTGGTGGTGGTGGCCCGCATTTCAGAACTC-3' | 44 mer    |
| PCR Ap3858 up    | 5' -GGATCCAATGACGAAAACAACCTCTGC-3'                   | 27 mer    |
| PCR Ap3858 low   | 5' -TGAGGATCGGTTTCCACAAG-3'                          | 20 mer    |
| PCR Ap3857 up    | 5' -GGATCCAATGACGATCACTAACGATAAAC-3'                 | 29 mer    |
| PCR Ap3857 low   | 5' -ATGCAGAATAGCCCGTAAAC-3'                          | 20 mer    |
| PCR Ap3856 up    | 5' -GGATCCAATGCTTCTATTTGTCCGAGG-3'                   | 27 mer    |
| PCR Ap3856 low   | 5' -ATAGTAACTAGAAAACGGGAC-3'                         | 20 mer    |
| PCR Ap3855 up    | 5' -GGATCCA ATGTCTTTATTACGAGTTTTAC-3'                | 29 mer    |
| PCR Ap3855 low   | 5' -AAGCCTGTCTGTAACGCTGC-3'                          | 20 mer    |
| PCR AprnpB up    | 5' -TGAGGAAAGTCCGGGCTTCC-3'                          | 20 mer    |
| PCR AprnpB low   | 5' -GGACATAAGCCGGGTTCTGT-3'                          | 20 mer    |
| PCR AppsaD up    | 5' -GAGTGAATTACTTTCTGGAC-3'                          | 20 mer    |
| PCR AppsaD low   | 5' -TTCATAGGGGGTTTTTCCAG-3'                          | 20 mer    |
